# Supplementary material for: Head-to-head comparisons of Toxoplasma gondii and its near relative Hammondia hammondi reveal dramatic differences in the host response and effectors with species-specific functions
Source: PubMed Central journal article supplement (PMC7360062; doi:10.1371/journal.ppat.1008528), 2020-06-23
Supplement: ppat.1008528.s001.pdf [file ppat.1008528.s001.pdf]

## SUPPLEMENTARY FIGURES

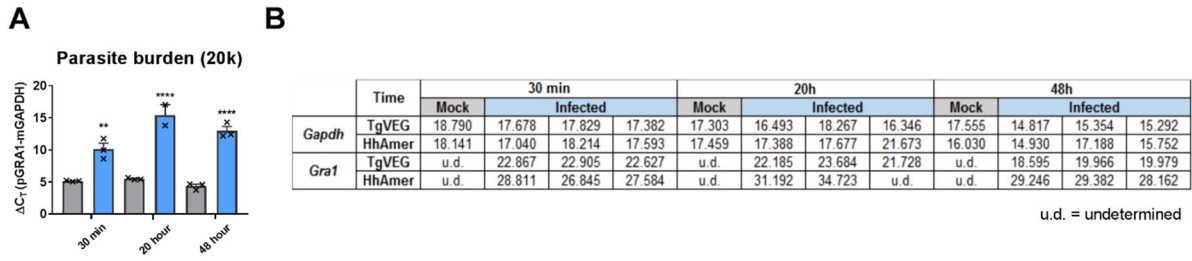

**S1 Fig. *T. gondii* VEG (TgVEG) and *H. hammondi* Amer (HhAmer) sporozoite infections *in vivo*.** Mice were infected intraperitoneally with *T. gondii* (TgVEG; grey) or *H. hammondi* (HhAmer; blue). Mice were also mock-infected with filter-sterilized (0.2  $\mu\text{m}$ ) parasite preparations. Mouse peritoneal cell RNA was collected at 30 min, 20 and 48 h post-infection and mRNA levels of parasite *GRA1* were quantified using RT-qPCR as a proxy for parasite abundance, using mouse *Gapdh* as the reference gene. (A) *T. gondii* or *H. hammondi* *GRA1* transcript abundance relative to mouse *Gapdh* transcript abundance in mice infected with 20,000 freshly excysted TgVEG or HhAmer sporozoites. Bar graphs show  $\Delta C_T$  ( $C_T \text{ GRA1} - C_T \text{ Gapdh}$ ) at three different time points post-infection. Parasite burdens of HhAmer are lower than TgVEG (smaller  $\Delta C_T$  values observed in mice infected with TgVEG; Sidak's multiple comparisons test  $**p < 0.01$  and  $****p < 0.0001$  within each time point). (B) Table showing  $C_T$  values of mice infected with *T. gondii* or *H. hammondi* at indicated time points.
