# Supplementary material for: Head-to-head comparisons of Toxoplasma gondii and its near relative Hammondia hammondi reveal dramatic differences in the host response and effectors with species-specific functions
Source: PubMed Central journal article supplement (PMC7360062; doi:10.1371/journal.ppat.1008528), 2020-06-23
Supplement: ppat.1008528.s002.pdf [file ppat.1008528.s002.pdf]

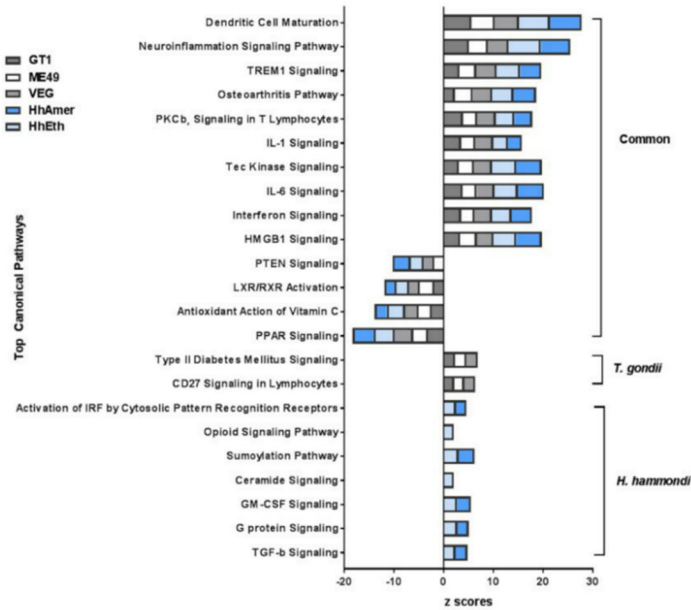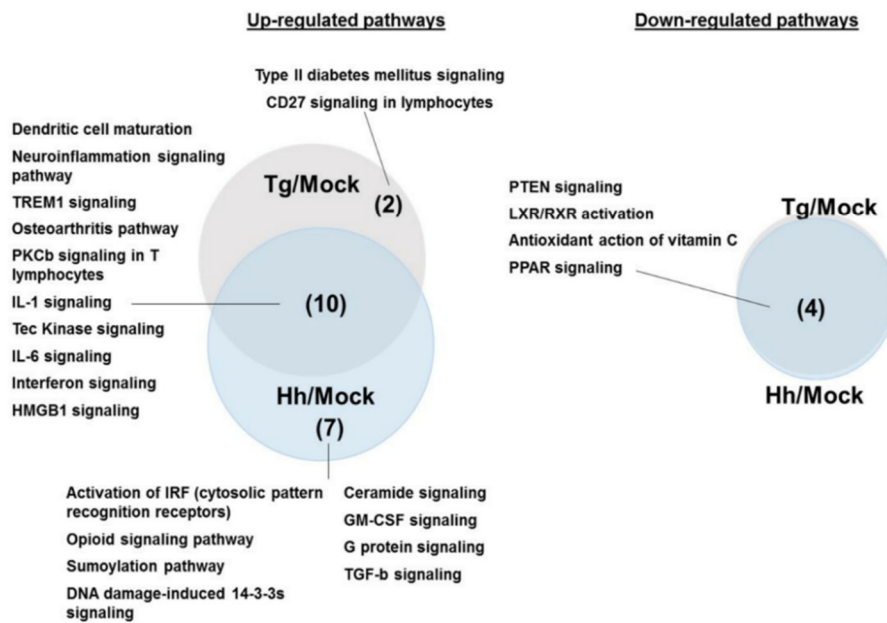

**S2A Fig. Top canonical pathways enriched (z scores) in *T. gondii* or *H. hammondi*-infected THP-1 cells compared to mock-infected cells.** Log<sub>2</sub> fold-change and DESeq2-derived  $p_{adj}$  values of genes with differential transcript abundance ( $\log_2$  fold-change  $\geq 2$  or  $\leq -2$ ;  $p_{adj} < 0.01$ ) were analyzed by Ingenuity Pathways Analysis®. **(Top Panel)** Stacked bars show pathways significantly enriched in infected cells compared to mock-treatment ( $-\log_{10}(p\text{-value}) > 1.3 = p < 0.05$ ; z scores  $\geq 2$  or  $\leq -2$ ). Positive z scores represent pathways that were enriched in infected cells and negative z scores represent pathways enriched in uninfected cells. **(Bottom panel)** The majority of pathways enriched in infected or mock-treated cells were shared between *T. gondii* and *H. hammondi* infection. Exceptions for each species are indicated.

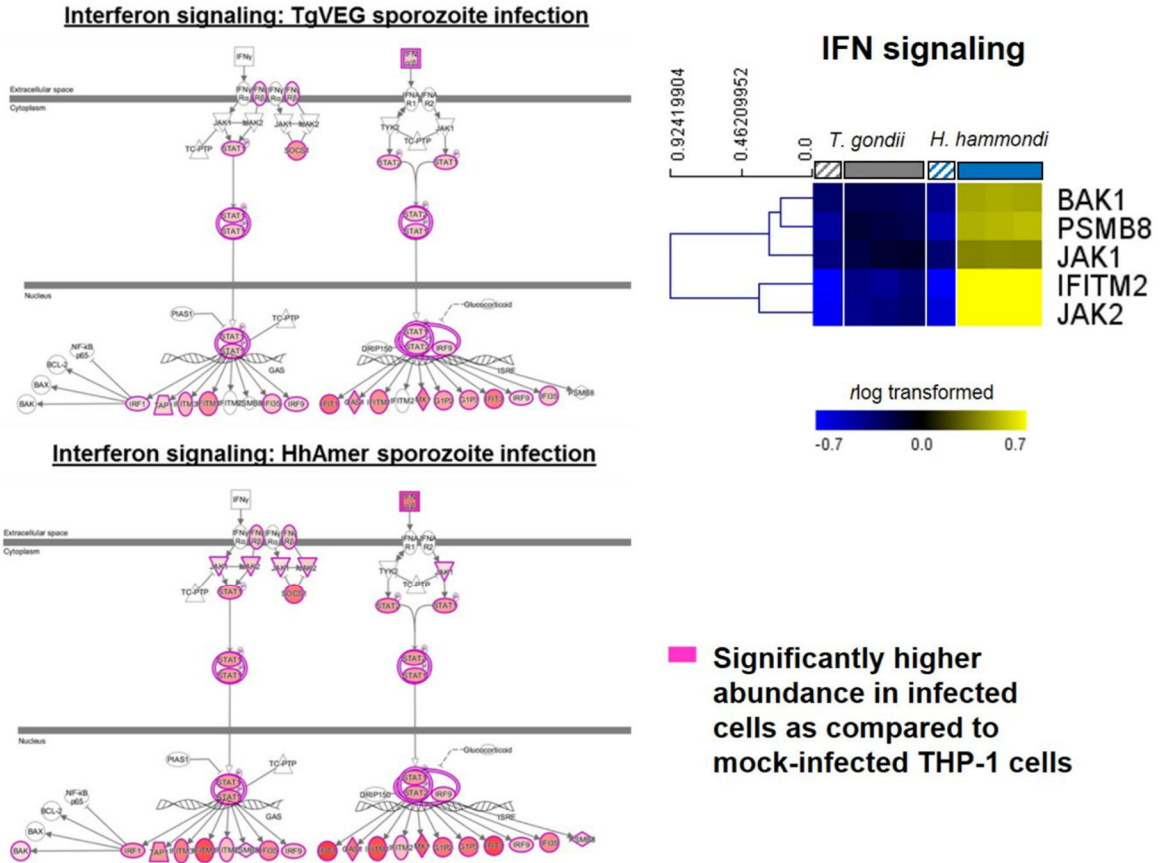

**S2B Fig. *T. gondii* and *H. hammondi*-infected cells share many similar activated pathways but with significant quantitative differences. (Left panel)** THP-1 cells infected with *T. gondii* or *H. hammondi* have significantly higher levels of the majority of transcripts belonging to the Canonical Interferon signaling pathway (from IPA), suggesting that this pathway is targeted by and/or responds to both species. **(Right Panel)** Heatmap of transcript abundance ( $\log_2$ -transformed) from TgVEG and HhAmer-infected THP-1 cells for some members of the Interferon signaling pathway illustrates species-specific transcript abundances. Infected cells shown are represented by the solid boxes while mock-infected cells represented by striped boxes. Data were mean-centered and hierarchically-clustered (Euclidean distance).

## IFN- $\gamma$ response

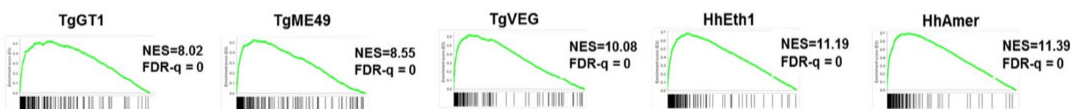

## MYC targets

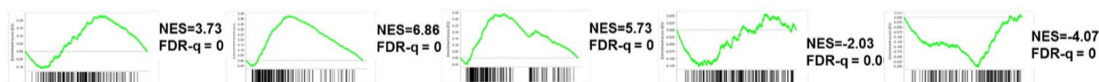

**S2C Fig. Enrichment plots from Gene Set Enrichment Analysis (GSEA) of THP-1 cells infected with *T. gondii* or *H. Hammondii*.** Enrichment plots showing GSEA results for *IFN $\gamma$  response* (top panels) and *MYC targets v1* gene sets (bottom panels) in THP-1 cells after infection with *T. gondii* (Tg) or *H. Hammondii* (Hh). Rank is based on log<sub>2</sub>-transformed normalized transcript abundance in infected cells compared to mock. Normalized enrichment scores (NES) are also indicated for each of the plots. The *IFN $\gamma$  response* gene set was highly positively enriched in response to *T. gondii* and *H. Hammondii* infection while *MYC targets v1* gene set was positively enriched in *T. gondii*-infected cells and negatively enriched in *H. Hammondii*-infected cells.
