# Supplementary material for: Head-to-head comparisons of Toxoplasma gondii and its near relative Hammondia hammondi reveal dramatic differences in the host response and effectors with species-specific functions
Source: PubMed Central journal article supplement (PMC7360062; doi:10.1371/journal.ppat.1008528), 2020-06-23
Supplement: ppat.1008528.s003.pdf [file ppat.1008528.s003.pdf]

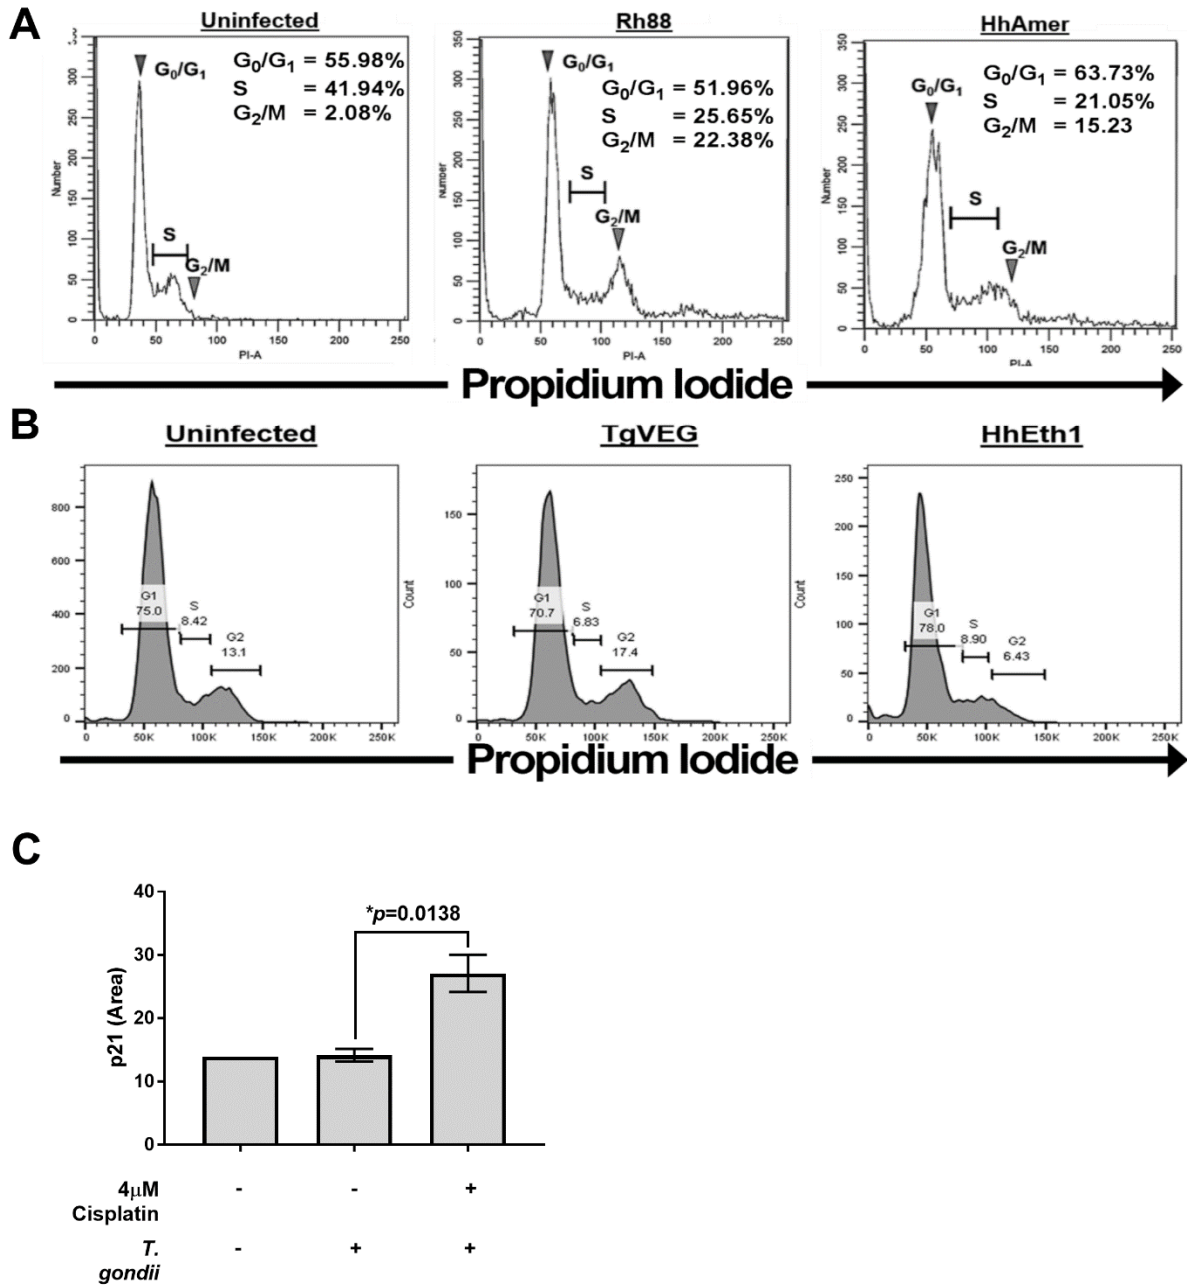

**S3 Fig.** (A,B) Representative histograms showing cell cycle progression in THP-1 (A) and U2OS (B) cells infected with *T. gondii* (Rh88 or TgVEG) or *H. Hammondii* (HhAmer or HhEth1) for 20 hours. Both host cell types showed increased percentages of cells in G<sub>2</sub>/M after infection with *T. gondii*, while *H. Hammondii* infection led to more cells in G<sub>0</sub>/G<sub>1</sub> and fewer in G<sub>2</sub>/M compared to uninfected cells. (C) Quantification of p21 immunofluorescence in 4µM cisplatin-treated HFFs compared to mock-treated HFFs. Cisplatin treatment significantly increased nuclear p21 staining intensity in HFFs compared to vehicle alone (\* $p=0.0136$ ).
