# Supplementary material for: Head-to-head comparisons of Toxoplasma gondii and its near relative Hammondia hammondi reveal dramatic differences in the host response and effectors with species-specific functions
Source: PubMed Central journal article supplement (PMC7360062; doi:10.1371/journal.ppat.1008528), 2020-06-23
Supplement: ppat.1008528.s004.pdf [file ppat.1008528.s004.pdf]

| Experiment | Sample     | <i>H. hammondi</i> GRA1 |
|------------|------------|-------------------------|
| Transwell® | Mock       | N.D                     |
|            | Infected_1 | N.D                     |
|            | Infected_2 | N.D                     |
|            | Infected_3 | N.D                     |
| Control    | Mock       | N.D                     |
|            | Infected_1 | 22.39                   |
|            | Infected_2 | 22.58                   |
|            | Infected_3 | 22.74                   |

**S4 Fig. Bystander cells lack any detectable expression of parasite transcript.**  $C_T$  values of *H. hammondi* GRA1 transcript detection in infected and bystander THP-1 cells (*H. hammondi* added to cells in the Transwell insert) N.D., Not Detected.
