# Supplementary material for: Head-to-head comparisons of Toxoplasma gondii and its near relative Hammondia hammondi reveal dramatic differences in the host response and effectors with species-specific functions
Source: PubMed Central journal article supplement (PMC7360062; doi:10.1371/journal.ppat.1008528), 2020-06-23
Supplement: ppat.1008528.s005.pdf [file ppat.1008528.s005.pdf]

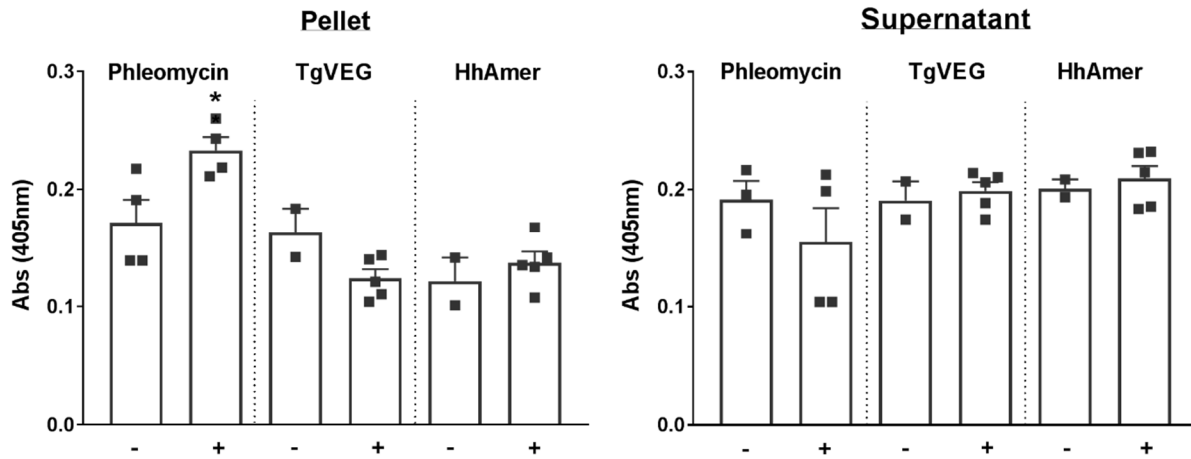

**S5 Fig.**  $\beta$ -galactosidase (gal) assay to detect activity of  $\beta$ -gal in THP-1 cells (Pellet) and supernatant. THP-1 cells were infected with *T. gondii* (TgVEG) or *H. hammondi* (HhAmer) sporozoites with an MOI of 1.6 for 72 h and cells and supernatants were collected to quantify  $\beta$ -gal activity. THP-1 cells were also treated with 50  $\mu$ g/uL phleomycin for 72 h to induce senescence and  $\beta$ -gal secretion as a positive control.  $\beta$ -gal activity was significantly higher in the phleomycin-treated THP-1 cells as compared to untreated THP-1 cells, while neither TgVEG nor HhAmer infection significantly altered secreted or cell-associated  $\beta$ -gal activity (Tukey's multiple comparisons test,  $p > 0.05$ ).
